# Supplementary material
Source: MDPI journal article supplement (https://www.mdpi.com/1999-4907/14/7/1297)
Supplement: s1 [file s1]

**Table S1.** The key indicators characterising major Russian cities (with a population of more than one million).

| №  | City             | Population (2021), people | Total urban area (2021), ha | The areas of the densest residential development, ha [56] | Area of parks and large clusters of trees within the densest residential development, ha [56] | The proportion of green spaces in the area of densest development, % | The number of stationary sources of air pollution (2019), pcs. | Pollutant emissions in air from stationary sources (2021), tonnes | Pollutant emissions in air from motor vehicles (2021), K. tonnes | Emissions from stationary sources per ha of the total city area, tonnes (in parentheses - per the densest area, tonnes) | Emissions from stationary sources per stationary sources, tonnes |
|----|------------------|---------------------------|-----------------------------|-----------------------------------------------------------|-----------------------------------------------------------------------------------------------|----------------------------------------------------------------------|----------------------------------------------------------------|-------------------------------------------------------------------|------------------------------------------------------------------|-------------------------------------------------------------------------------------------------------------------------|------------------------------------------------------------------|
| 1  | Moscow           | 12655050                  | 256149                      | 97405                                                     | 17586                                                                                         | 18.1                                                                 | 1950                                                           | 63314                                                             | 323.5                                                            | 0.247 (0.650)                                                                                                           | 32.5                                                             |
| 2  | Saint Petersburg | 5384342                   | 140313                      | 56428                                                     | 5000                                                                                          | 8.9                                                                  | 2105                                                           | 72231                                                             | 128.8                                                            | 0.515 (1.280)                                                                                                           | 34.3                                                             |
| 3  | Novosibirsk      | 1620162                   | 50275                       | 26880                                                     | 4571                                                                                          | 17.0                                                                 | 509                                                            | 78782                                                             | 54.5                                                             | 1.567 (2.931)                                                                                                           | 154.8                                                            |
| 4  | Yekaterinburg    | 1527525                   | 56569                       | 31241                                                     | 9696                                                                                          | 31.0                                                                 | 519                                                            | 23563                                                             | 56.4                                                             | 0.417 (0.754)                                                                                                           | 45.4                                                             |
| 5  | Nizhny Novgorod  | 1263650                   | 54337                       | 30161                                                     | 4819                                                                                          | 16.0                                                                 | 363                                                            | 19690                                                             | 47.9                                                             | 0.362 (0.653)                                                                                                           | 54.2                                                             |
| 6  | Kazan            | 1257341                   | 61416                       | 24210                                                     | 2820                                                                                          | 11.7                                                                 | 592                                                            | 28667                                                             | 41.5                                                             | 0.467 (1.184)                                                                                                           | 48.4                                                             |
| 7  | Chelyabinsk      | 1187960                   | 50091                       | 27866                                                     | 3835                                                                                          | 13.8                                                                 | 422                                                            | 112855                                                            | 40.8                                                             | 2.253 (4.050)                                                                                                           | 267.4                                                            |
| 8  | Samara           | 1144793                   | 54138                       | 17888                                                     | 5413                                                                                          | 30.3                                                                 | 377                                                            | 21603                                                             | 28.5                                                             | 0.399 (1.208)                                                                                                           | 57.3                                                             |
| 9  | Omsk             | 1139897                   | 57783                       | 28069                                                     | 2402                                                                                          | 8.6                                                                  | 473                                                            | 130236                                                            | 39.4                                                             | 2.254 (4.640)                                                                                                           | 275.3                                                            |
| 10 | Rostov-on-Don    | 1137704                   | 35621                       | 22284                                                     | 5025                                                                                          | 22.6                                                                 | 239                                                            | 7737                                                              | n/d                                                              | 0.217 (0.347)                                                                                                           | 32.4                                                             |
| 11 | Ufa              | 1137500                   | 70797                       | 15295                                                     | 4731                                                                                          | 30.9                                                                 | 368                                                            | 136593                                                            | 38.6                                                             | 1.929 (8.931)                                                                                                           | 371.2                                                            |
| 12 | Krasnoyarsk      | 1093628                   | 37946                       | 18016                                                     | 1674                                                                                          | 9.3                                                                  | 345                                                            | 108651                                                            | 78.5                                                             | 2.863 (6.031)                                                                                                           | 314.9                                                            |
| 13 | Voronezh         | 1050602                   | 59949                       | 20002                                                     | 4653                                                                                          | 23.3                                                                 | 381                                                            | 19031                                                             | 44.6                                                             | 0.317 (0.951)                                                                                                           | 50.0                                                             |
| 14 | Perm             | 1049199                   | 79968                       | 15298                                                     | 5488                                                                                          | 35.9                                                                 | 310                                                            | 37283                                                             | 44.1                                                             | 0.466 (2.437)                                                                                                           | 120.3                                                            |
| 15 | Krasnodar        | 1037888                   | 29468                       | 28679                                                     | 2319                                                                                          | 8.1                                                                  | 380                                                            | 14971                                                             | n/d                                                              | 0.508 (0.522)                                                                                                           | 39.4                                                             |
| 16 | Volgograd        | 1004763                   | 85953                       | 15411                                                     | 2453                                                                                          | 15.9                                                                 | 612                                                            | 96930                                                             | n/d                                                              | 1.128 (6.290)                                                                                                           | 158.4                                                            |
